# Supplementary material for: The Anti-Inflammatory Effect and Structure of EPCP1-2 from Crypthecodinium cohnii via Modulation of TLR4-NF-κB Pathways in LPS-Induced RAW 264.7 Cells
Source: PubMed Central journal article supplement (PMC5742836; doi:10.3390/md15120376), 2017-12-01
Supplement: marinedrugs-15-00376-s001.pdf [file marinedrugs-15-00376-s001.pdf]

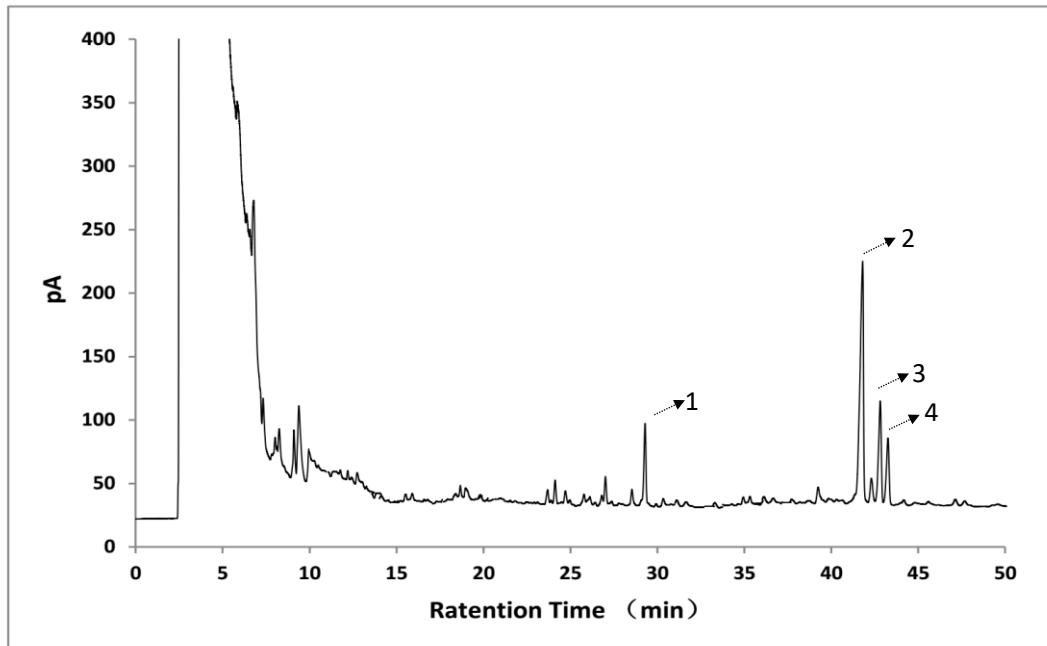

Supplement data 1. GC spectrum of monosaccharide composition of EPCP1-2.

Note:1: rhamnose; 2: mannose; 3: galactose; 4: glucose.

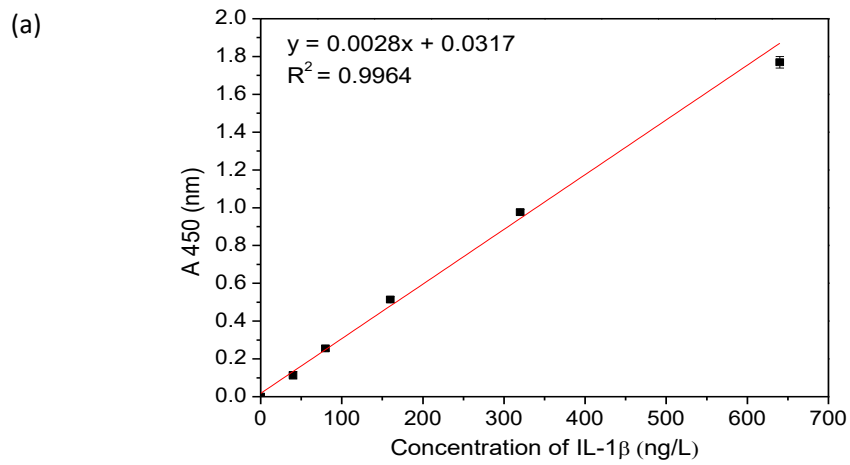

(b)

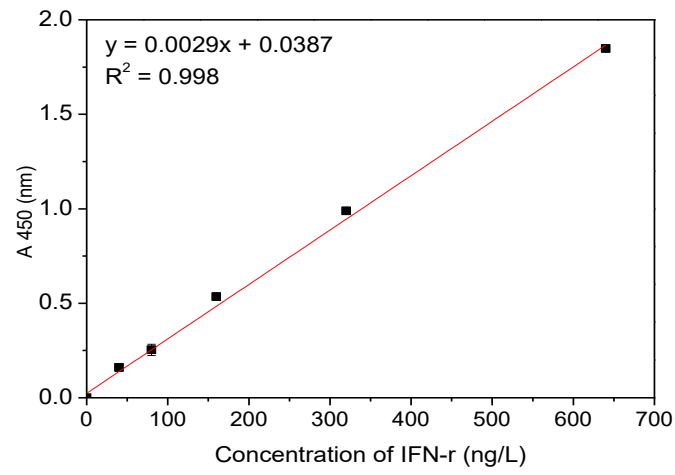

(c)

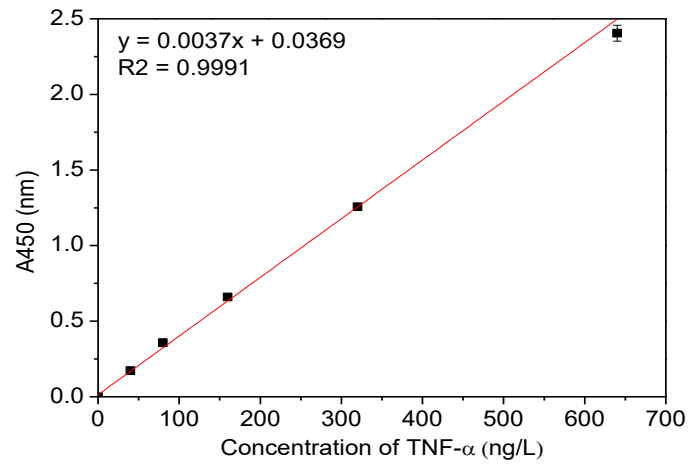

Supplement data 2. Standard curve of cytokines protein expression by Elisa (a) IL-1  $\beta$  (b) IFN-  $\gamma$  (c) TNF-  $\alpha$
